# Supplementary material for: Orientation of mesochannels in continuous mesoporous silica films by a high magnetic field
Source: Royal Society of Chemistry journal article supplement (doi:10.1039/b418478e), 2005-01-01
Supplement: b418478e.pdf [file b418478e.pdf]

## Orientation of Mesochannels in Continuous Mesoporous Silica Films by a High Magnetic Field

Yusuke Yamauchi,<sup>ab</sup> Makoto Sawada,<sup>a</sup> Takashi Noma,<sup>c</sup> Hidenosuke Ito,<sup>c</sup> Seiichi Furumi,<sup>d</sup> Yoshio Sakka,<sup>d</sup> and Kazuyuki Kuroda<sup>\*abef</sup>

<sup>a</sup> Department of Applied Chemistry, School of Science and Engineering, Waseda University, Ohkubo 3-4-1, Shinjuku-ku, Tokyo 169-8555, Japan. Fax: +81-3-5286-3199; Tel: +81-3-5286-3199; E-mail: kuroda@waseda.jp

<sup>b</sup> Graduate School of Science and Engineering, Waseda University, Ohkubo 3-4-1, Shinjuku-ku, Tokyo 169-8555, Japan.

<sup>c</sup> Leading-Edge Technology Development Headquarters, Canon Inc., Morino-sato-Wakamiya 5-1, Atsugi-shi, Kanagawa 243-0193, Japan.

<sup>d</sup> National Institute for Materials Science, Sengen 1-2-1, Tsukuba, Ibaraki 305-0047, Japan.

<sup>e</sup> Kagami Memorial Laboratory for Materials Science and Technology, Waseda University, Nishi-waseda 2-8-26, Shinjuku-ku, Tokyo 169-0051, Japan.

<sup>f</sup> CREST, Japan Science and Technology Agency, Honcho 4-1-8, Kawaguchi-shi, Saitama 332-0012, Japan.

### Electronic Supporting Information

Extra data for the films prepared under a high magnetic field

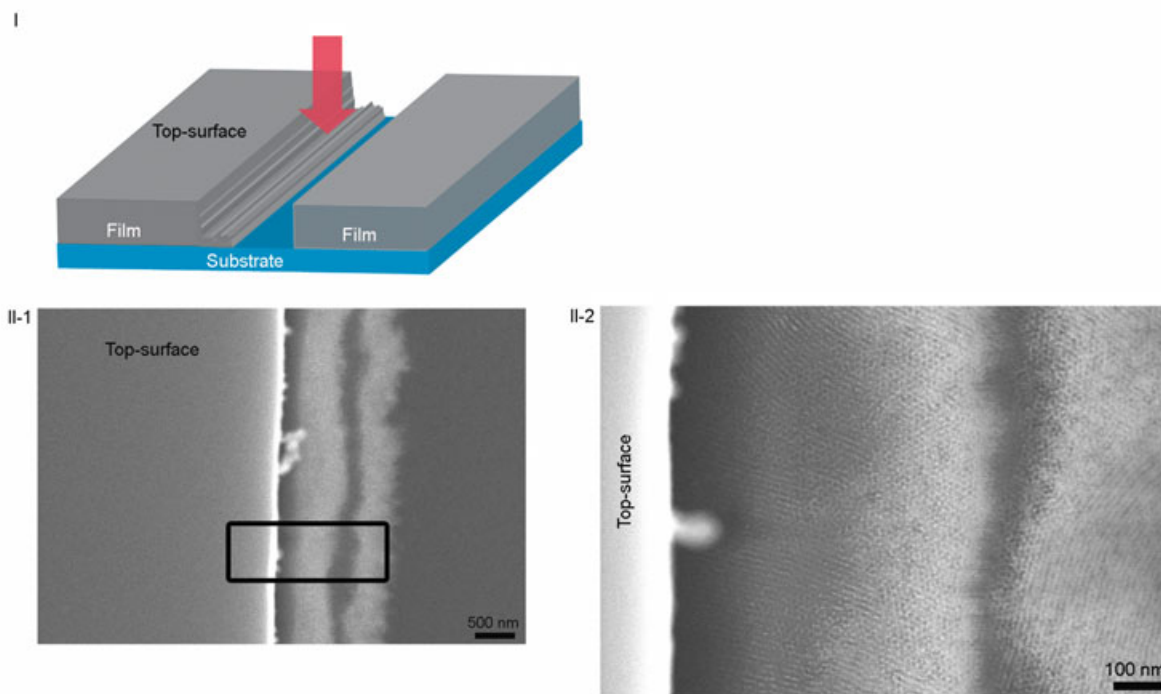

**Fig. A** I) Schematic presentation of the view of the uneven part of the film produced by cracking. II) HR-SEM images of the calcined Film E prepared under the perpendicular magnetic field to the substrate. [II-1); The entire morphology of the film at a low magnification, II-2); tubular mesochannels and honeycomb-like arrangements of mesopores.]

### Characterizations

XRD measurements: The  $\theta$ - $2\theta$  scanning profiles in the lower diffraction angles were measured by a Mac Science M03XHF22 diffractometer with Mn-filtered Fe-K $\alpha$  radiation (40 kV, 20 mA) at a scanning rate of 0.5 °/min. The in-plane XRD study was performed on an X-ray diffractometer equipped with a four-axes goniometer (Rigaku ATX-G) using Ni-filtered Cu-K $\alpha$  radiation (50 kV, 300 mA). The incident angle of X-rays was set at 0.3°.

TEM and SEM observations: The cross-sectional slices of as-grown film C, less than 100 nm in thickness, were prepared by using an ultramicrotome. TEM images were observed by a JEOL JEM-2010 transmission electron microscope using an accelerating voltage of 200 kV. The high resolution scanning electron micrographs with osmium coating were observed with a Hitachi S-5200 scanning electron microscope using an accelerating voltage of 20 kV.
